# Supplementary material for: APE in the Wild: Automated Exploration of Proteomics Workflows in the bio.tools Registry
Source: PubMed Central journal article supplement — J Proteome Res. 2021 Mar 15;20(4):2157–65. doi: 10.1021/acs.jproteome.0c00983 (PMC8041394; doi:10.1021/acs.jproteome.0c00983), 2021-03-15
Supplement: pr0c00983_si_001.pdf [file pr0c00983_si_001.pdf]

# Supporting information for:

## APE in the Wild: Automated Exploration of Proteomics Workflows in the bio.tools Registry

Vedran Kasalica,<sup>\*,†</sup> Veit Schwämmle,<sup>‡</sup> Magnus Palmblad,<sup>¶</sup> Jon Ison,<sup>§</sup> and  
Anna-Lena Lamprecht<sup>\*,†</sup>

<sup>†</sup>*Dept. of Information and Computing Sciences, Utrecht University, The Netherlands*

<sup>‡</sup>*Dept. of Biochemistry and Molecular Biology, University of Southern Denmark, Denmark*

<sup>¶</sup>*Center for Proteomics and Metabolomics, Leiden University Medical Center, The Netherlands*

<sup>§</sup>*Institut Français de Bioinformatique, CNRS, France*

E-mail: v.kasalica@uu.nl; a.l.lamprecht@uu.nl

### Table of Contents:

- *Table S1*: List of up to 100 solutions generated for each run for Use Case 1 - (supplementary files)
- *Table S2*: List of up to 100 solutions generated for each run for Use Case 2 - (supplementary files)
- *Table S3*: List of up to 100 solutions generated for each run for Use Case 3 - (supplementary files)

- *Table S4*: List of up to 100 solutions generated for each run for Use Case 4 - (supplementary files)
- *Table S5*: Spreadsheet contains general information regarding the exploration runs. Columns aggregate solutions found for each run based on their length - page S-3
- *Table S6*: Quality evaluation of the first 20 workflows per each run, for Use Case 1 - (supplementary files)
- *Table S7*: Quality evaluation of the first 20 workflows per each run, for Use Case 2 - (supplementary files)
- *Table S8*: Quality evaluation of the first 20 workflows per each run, for Use Case 3 - (supplementary files)
- *Table S9*: Quality evaluation of the first 20 workflows per each run, for Use Case 4 - (supplementary files)
- *Table S10*: Summary of the evaluation results - (supplementary files)
- *Figure S1*: Distribution of the workflow quality scores using a box plot - page S-4
- *File S1*: Tool annotations provided for the original domain - (supplementary files)
- *File S2*: Tool annotations provided for the extended domain - (supplementary files)
- *File S1*: Tool annotations provided for the full domain - (supplementary files)

Table S 5: Numbers of workflows obtained in the experiments.

| Length             | Original |       | Extended |       | Full bio.tools |       |
|--------------------|----------|-------|----------|-------|----------------|-------|
|                    | I/O      | I/O+C | I/O      | I/O+C | I/O            | I/O+C |
| <b>Use Case #1</b> |          |       |          |       |                |       |
| 1                  | 0        | 0     | 0        | 0     | 0              | 0     |
| 2                  | 0        | 0     | 0        | 0     | 0              | 0     |
| 3                  | 1        | 0     | 12       | 1     | 15             | 2     |
| 4                  | 6        | 1     | 100      | 38    | 100            | 45    |
| 5                  | 25       | 8     |          | 100   |                | 100   |
| 6                  | 96       | 39    |          |       |                |       |
| 7                  | 100      | 100   |          |       |                |       |
| <b>Use Case #2</b> |          |       |          |       |                |       |
| 1                  | 0        | 0     | 1        | 0     | 1              | 0     |
| 2                  | 0        | 0     | 11       | 0     | 12             | 0     |
| 3                  | 0        | 0     | 100      | 0     | 100            | 0     |
|                    |          |       | ...      |       |                |       |
| 8                  | 0        | 0     |          | 0     |                | 0     |
|                    |          |       | ...      |       |                |       |
| 20                 | 0        | 0     |          | 0     |                |       |
| <b>Use Case #3</b> |          |       |          |       |                |       |
| 1                  | 0        | 0     | 1        | 0     | 1              | 0     |
| 2                  | 1        | 0     | 47       | 0     | 54             | 0     |
| 3                  | 7        | 0     | 100      | 0     | 100            | 0     |
| 4                  | 31       | 1     |          | 7     |                | 8     |
| 5                  | 100      | 5     |          | 100   |                | 100   |
| 6                  |          | 14    |          |       |                |       |
| 7                  |          | 33    |          |       |                |       |
| 8                  |          | 72    |          |       |                |       |
| 9                  |          | 100   |          |       |                |       |
| <b>Use Case #4</b> |          |       |          |       |                |       |
| 1                  | 0        | 0     | 1        | 0     | 1              | 0     |
| 2                  | 1        | 0     | 15       | 0     | 23             | 0     |
| 3                  | 3        | 0     | 100      | 2     | 100            | 3     |
| 4                  | 8        | 1     |          | 75    |                | 85    |
| 5                  | 24       | 6     |          | 100   |                | 100   |
| 6                  | 81       | 26    |          |       |                |       |
| 7                  | 100      | 100   |          |       |                |       |

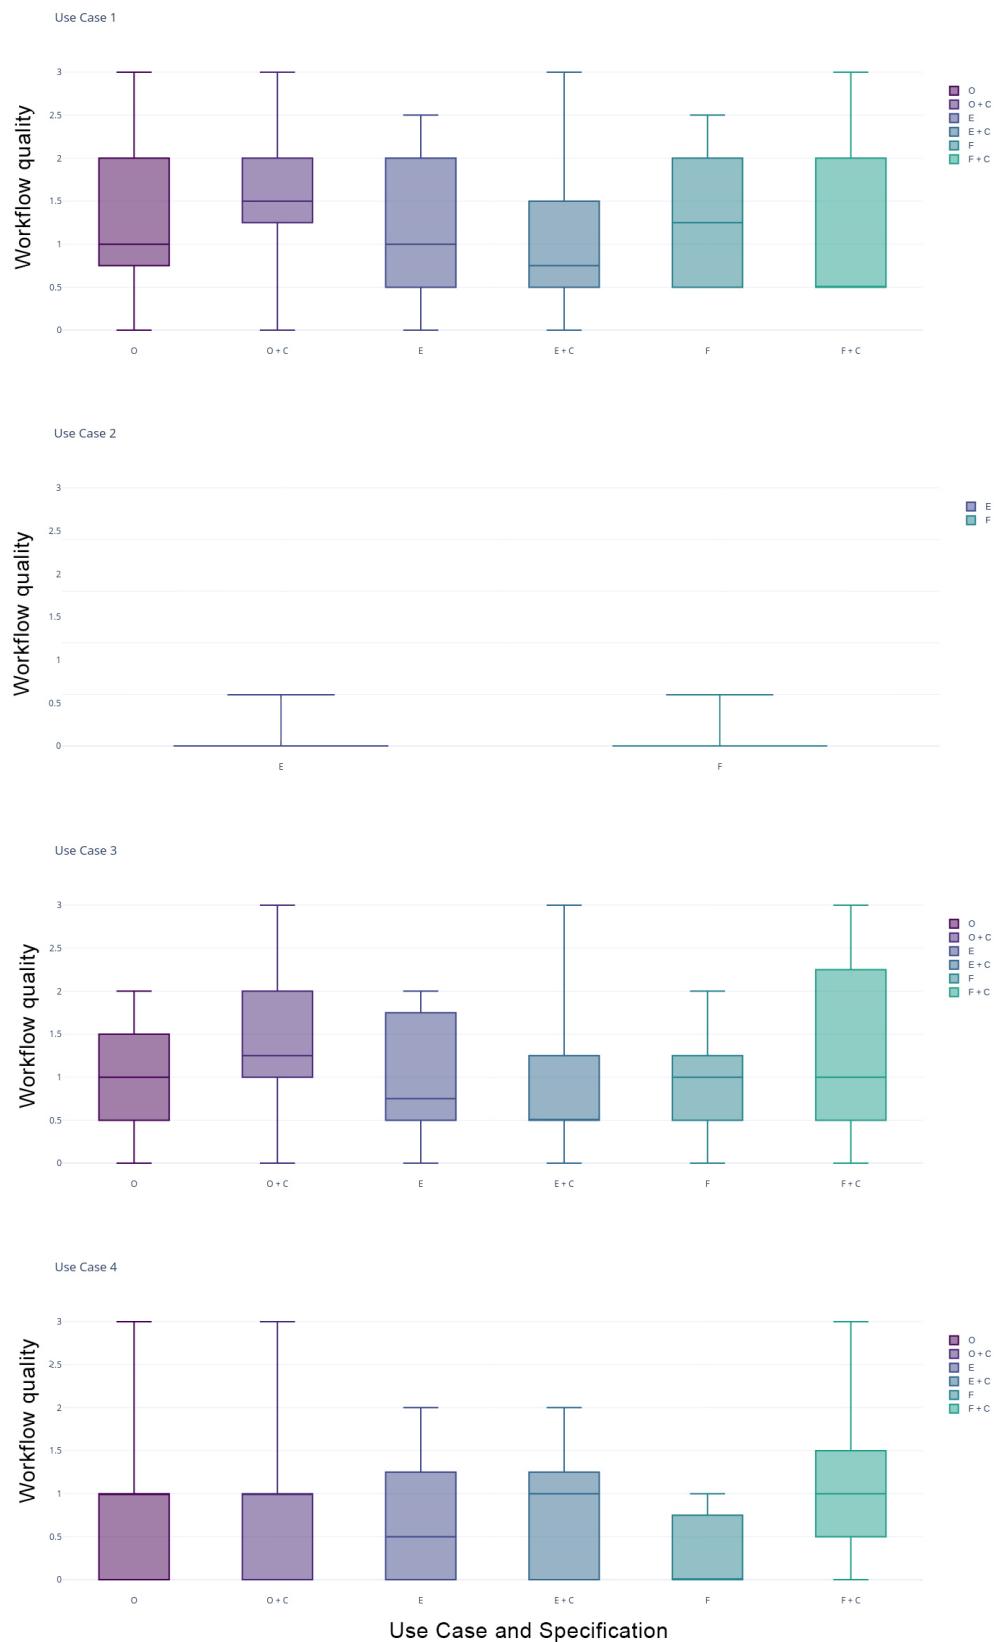

Figure S 1: Workflow quality evaluation
